# Supplementary material
Source: HighWire-hosted journal article supplement (https://erj.ersjournals.com/content/61/1/2202008)

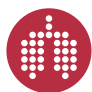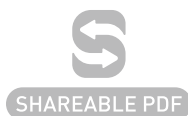

# Identification of two specific transcriptomic clusters of COVID-19 acute respiratory distress syndrome patients with different immune profiles and different outcomes

Yuichiro Shindo <sup>1</sup>, Charles S. Dela Cruz<sup>2</sup> and Martin Witzentrath<sup>3,4</sup>

<sup>1</sup>Department of Respiratory Medicine, Nagoya University Graduate School of Medicine, Nagoya, Japan. <sup>2</sup>Section of Pulmonary, Critical Care and Sleep Medicine, Department of Internal Medicine, Yale School of Medicine, New Haven, CT, USA. <sup>3</sup>Charité-Universitätsmedizin Berlin, Department of Infectious Diseases and Respiratory Medicine, Berlin, Germany. <sup>4</sup>German Center for Lung Research (DZL), Berlin, Germany.

Corresponding author: Martin Witzentrath ([martin.witzentrath@charite.de](mailto:martin.witzentrath@charite.de))

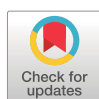

Shareable abstract (@ERSpublications)

**Transcriptomic clustering of patients with ARDS due to COVID-19 identified different immune profiles and outcomes. This demonstrates heterogeneity among COVID-19 ARDS patients and may help to establish personalised therapies.** <https://bit.ly/3h61sCj>

**Cite this article as:** Shindo Y, Dela Cruz CS, Witzentrath M. Identification of two specific transcriptomic clusters of COVID-19 acute respiratory distress syndrome patients with different immune profiles and different outcomes. *Eur Respir J* 2023; 61: 2202008 [DOI: 10.1183/13993003.02008-2022].

This single-page version can be shared freely online.

Copyright ©The authors 2023.

This version is distributed under the terms of the Creative Commons Attribution Non-Commercial Licence 4.0. For commercial reproduction rights and permissions contact [permissions@ersnet.org](mailto:permissions@ersnet.org)

Received: 17 Oct 2022  
Accepted: 26 Oct 2022

Severe acute respiratory syndrome coronavirus 2 (SARS-CoV-2) is the cause of the respiratory illness COVID-19 (coronavirus disease 2019). The virus was first identified in December 2019 in Wuhan, China and has since then spread globally, resulting in the ongoing SARS-CoV-2 pandemic, causing more than 615 million confirmed cases of infection (<https://covid19.who.int/>). Although the largest proportion of SARS-CoV-2 infections in humans is characterised by a mild course of disease, about 5% to 20% of patients are hospitalised with COVID-19 due to a more severe course of disease, and require admission to the intensive care unit for diffuse lung infiltrates and severe hypoxaemia [1]. This in turn can lead to the development of acute respiratory distress syndrome (ARDS). Multiple and heterogenous factors are known to cause ARDS, which is pathophysiologically characterised by acute diffuse damage to the alveolar-capillary barrier of the lung, resulting in flooding of the alveolar space as well as severely limited gas exchange [2, 3]. Among the contributing factors to ARDS are surfactant dysfunction along with a reduction of the capacity of alveolar type I and II (ATI and ATII) epithelial cells to absorb excess fluid from the airspaces into the lung interstitium. Normally, fluid is eliminated from the lung interstitium via lymphatic capillaries by vectorial ion transport. The hypoxaemia seen in ARDS results from ventilation/perfusion mismatch and increased shunt perfusion, clinically detected by bilateral opacities on chest radiographs, associated with a decrease in lung compliance and increases in venous admixture of insufficiently oxygenated blood and physiological dead space. Also, acute exudative and proliferative phases are often followed by barrier repair and/or by lung fibrosis.

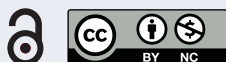

Supplement: inline-supplementary-material-1 [file inline-supplementary-material-1.pdf]
